# Supplementary material for: Tracking the polio virus down the Congo River: a case study on the use of Google Earth™ in public health planning and mapping
Source: PubMed Central journal article supplement (PMC2645371; doi:10.1186/1476-072x-8-4), 2009-01-22
Supplement: 1476-072X-8-4-S3.pdf [file 1476-072X-8-4-S3.pdf]

```
<?php
/*
Coded by Dr Raoul Kamadjeu
Submitted as additional material to IJHG submission
This is only one way of doing this.
*/
//connect to database
$conn = mysql_connect('localhost', 'root', '') or die(mysql_error());
mysql_select_db('DBname');
?>
<html>
<head>

</head>

<body>

<?php

$kml=" ";
$kml .= "
<?xml version='1.0' encoding='UTF-8'?>
<kml xmlns='http://earth.google.com/kml/2.2'>
<Document>
  <name>DRC Population Density Map.kml</name>
  <open>1</open>
  <Style id='grad1'>
    <LineStyle>
      <color>00ffffff</color>
    </LineStyle>
    <PolyStyle>
      <color>ffccffff</color>
    </PolyStyle>
  </Style>
  <Style id='grad2'>
    <LineStyle>
      <color>00ffffff</color>
    </LineStyle>
    <PolyStyle>
      <color>ff99ffff</color>
    </PolyStyle>
  </Style>
  <Style id='grad3'>
    <LineStyle>
      <color>00ffffff</color>
    </LineStyle>
    <PolyStyle>
      <color>ff66ffff</color>
    </PolyStyle>
  </Style>
  <Style id='grad4'>
    <LineStyle>
      <color>00ffffff</color>
    </LineStyle>
    <PolyStyle>
      <color>ff33ffff</color>

```

```
        </PolyStyle>
</Style>
<Style id='grad5'>
  <LineStyle>
    <color>00ffffff</color>
  </LineStyle>
  <PolyStyle>
    <color>ff00ecec</color>
  </PolyStyle>
</Style>
<Style id='grad6'>
  <LineStyle>
    <color>00ffffff</color>
  </LineStyle>
  <PolyStyle>
    <color>ff00cccc</color>
  </PolyStyle>
</Style>
<Style id='grad7'>
  <LineStyle>
    <color>00ffffff</color>
  </LineStyle>
  <PolyStyle>
    <color>ff04a4ac</color>
  </PolyStyle>
</Style>
<Style id='grad8'>
  <LineStyle>
    <color>00ffffff</color>
  </LineStyle>
  <PolyStyle>
    <color>ff03767c</color>
  </PolyStyle>
</Style>
<Style id='grad9'>
  <LineStyle>
    <color>00ffffff</color>
  </LineStyle>
  <PolyStyle>
    <color>ff014649</color>
  </PolyStyle>
</Style>
<Style id='grad10'>
  <LineStyle>
    <color>00ffffff</color>
  </LineStyle>
  <PolyStyle>
    <color>ff001f20</color>
  </PolyStyle>
</Style>" ;
$xml .= "<Folder>" ;
$xml .= "<name>DRC population Density Map - 2007</name>" ;
/*Query database to get values for districts, coordinates and population density
based on value of density, we assign a specific color to the polygon by using the
kml <styleUrl> attributes which are define in the kml <style>
*/
```

```
$geoname="select district.district, district.coordinate, area.pdensity from
district,area where district.district=area.district";
```

```
    if ($result = mysql_query($geoname)) {
        if (mysql_num_rows($result)) {
            while (list($district, $coordinate, $density) =
mysql_fetch_array($result)) {

                $kml .="
                <Placemark>
                    <name>$district</name>
                    <visibility>1</visibility>";
                    if($density<5){
                    $kml .="<styleUrl>#grad1</styleUrl>";
                    }
                    if($density>=5 && $density<10 ){
                        $kml .="<styleUrl>#grad2</styleUrl>";
                    }
                    if($density>=10 && $density<20 ){
                        $kml .="<styleUrl>#grad3</styleUrl>";
                    }
                    if($density>=20 && $density<50 ){
                        $kml .="<styleUrl>#grad4</styleUrl>";
                    }
                    if($density>=50 && $density<75 ){
                        $kml .="<styleUrl>#grad5</styleUrl>";
                    }
                    if($density>=75 && $density<100 ){
                        $kml .="<styleUrl>#grad6</styleUrl>";
                    }
                    if($density>=100 && $density<150 ){
                        $kml .="<styleUrl>#grad7</styleUrl>";
                    }
                    if($density>=150 && $density<300 ){
                        $kml .="<styleUrl>#grad8</styleUrl>";
                    }
                    if($density>=300 && $density<1000 ){
                        $kml .="<styleUrl>#grad9</styleUrl>";
                    }
                    if($density>=1000 ){
                        $kml .="<styleUrl>#grad10</styleUrl>";
                    }
                }
                $kml .="
                <Polygon>
                    <altitudeMode>Absolute</altitudeMode>
                    <outerBoundaryIs>
                        <LinearRing>
                            <coordinates>$coordinate
                            </coordinates>
                        </LinearRing>
                    </outerBoundaryIs>
                </Polygon>
                </Placemark>
                ";
            }
        }
    }
```

```
        }  
    }  
  
    $kml .= "</Folder>  
        </Document>  
</kml>";  
  
    //output the kml file  
    print $kml;  
  
?>  
</body>  
</html>
```
